# Supplementary figures and images for: Schools As a Vital Component of the Child and Adolescent Mental Health System
Source: Atypon-hosted journal article supplement (doi:10.1176/appi.ps.201900575), 2020-11-03

## Multi-tiered System of Supports (MTSS) in the context of other child-serving systems

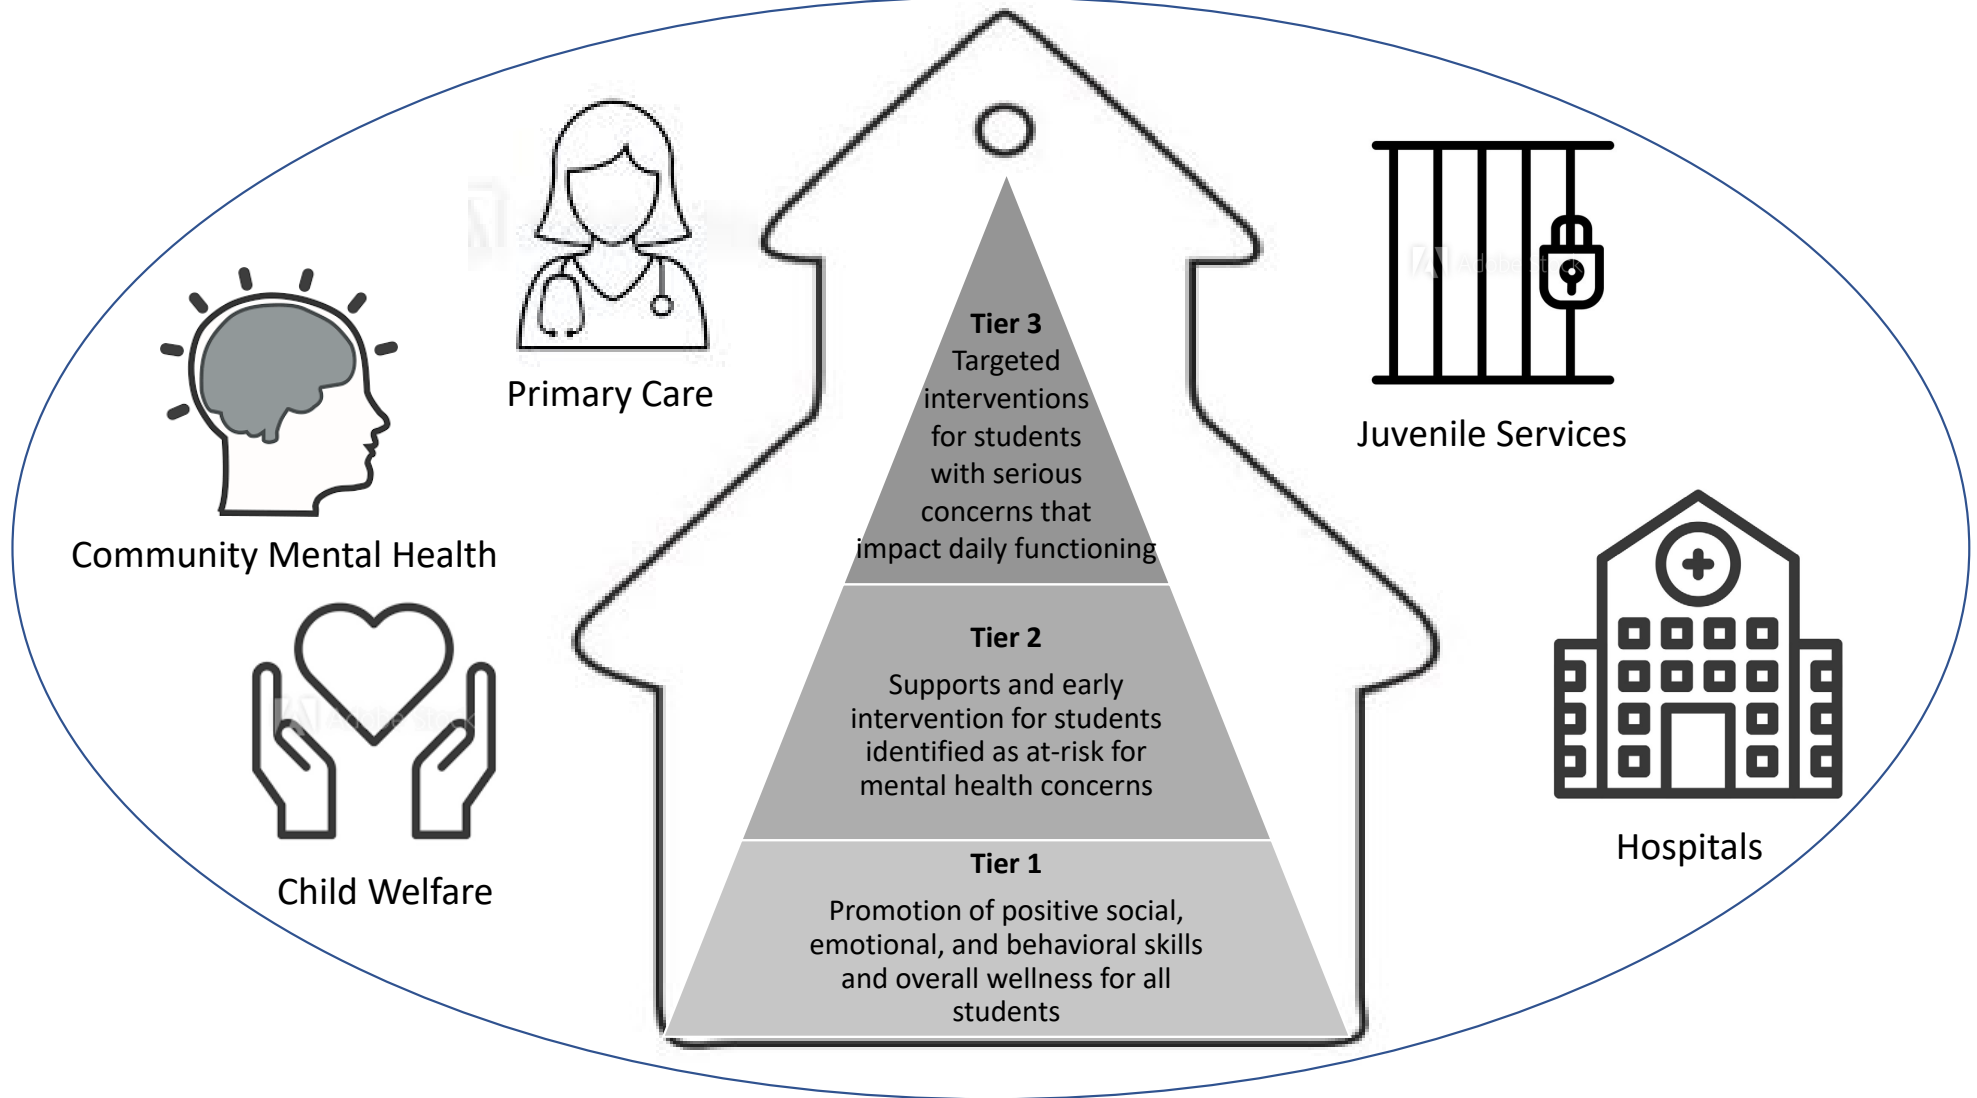

Supplement: appi.ps.201900575.ds001.pdf [file appi.ps.201900575.ds001.pdf]
